# Supplementary material
Source: publisher figshare collection journal article supplement (https://tandf.figshare.com/ndownloader/files/17761748)
Supplement: Supplementary file 1 [file 17761748]

**Appendix A: Statistical Regression table**

|  |  |  |  |  |  |
| --- | --- | --- | --- | --- | --- |
| *Regression results for all experiments* |  |  |  |  |  |
| EXPERIMENT 1 |  |  |  |  |  |
| Fixed effects | Estimate | s.e. | *z* | *p* | significance |
| (Intercept) | -0.444 | 0.097 | -4.564 | 0.000 | *** |
| Regularity (regular/irregular) | -0.111 | 0.047 | -2.376 | 0.018 | * |
| Pattern (SW/WS) | 0.490 | 0.098 | 4.978 | 0.000 | *** |
| Target status (target/other) | 0.030 | 0.172 | 0.172 | 0.863 |  |
| Log word frequency | -0.083 | 0.026 | -3.226 | 0.001 | ** |
| Number of times checked in normalization task | 0.008 | 0.013 | 0.651 | 0.515 |  |
| Regularity:Pattern | 0.093 | 0.066 | 1.401 | 0.161 |  |
| Regulartity: Target Status | 0.816 | 0.241 | 3.391 | 0.001 | *** |
| Patter:Target Status | -0.222 | 0.267 | -0.832 | 0.405 |  |
| Regularity:Pattern:Target Status | -0.099 | 0.461 | -0.214 | 0.830 |  |
|  |  |  |  |  |  |
| EXPERIMENT 2 |  |  |  |  |  |
| Fixed effects | Estimate | s.e. | *z* | *p* | significance |
| (Intercept) | -0.086 | 0.102 | -0.843 | 0.399 |  |
| Regularity (regular/irregular) | -0.043 | 0.058 | -0.734 | 0.463 |  |
| Pattern (SW/WS) | 0.465 | 0.058 | 8.063 | 0.000 | *** |
| Target status (target/other) | -0.051 | 0.083 | -0.616 | 0.538 |  |
| Log word frequency | -0.104 | 0.019 | -5.411 | 0.000 | *** |
| Regularity:Pattern | 0.057 | 0.081 | 0.707 | 0.480 |  |
| Regulartity: Target Status | 0.735 | 0.117 | 6.310 | 0.000 | *** |
| Patter:Target Status | -0.444 | 0.114 | -3.906 | 0.000 | *** |
| Regularity:Pattern:Target Status | -0.214 | 0.161 | -1.324 | 0.185 |  |
|  |  |  |  |  |  |
